# Supplementary material for: Combining an Autophagy Inhibitor, MPT0L145, with Abemaciclib Is a New Therapeutic Strategy in GBM Treatment
Source: MDPI journal article supplement (doi:10.3390/cancers13236117), 2021-12-04
Supplement: s1 [file s1]

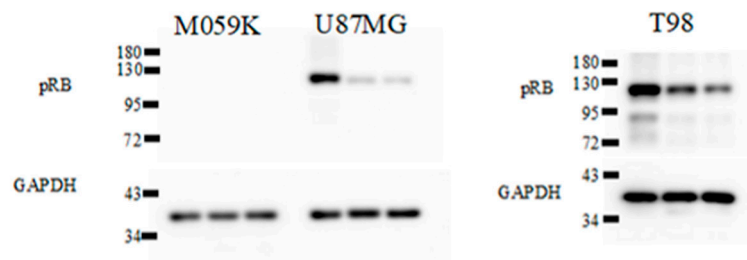

Figure S1. Abemaciclib treatment regulates RB phosphorylation on the U87MG, T98G and M059K cells.

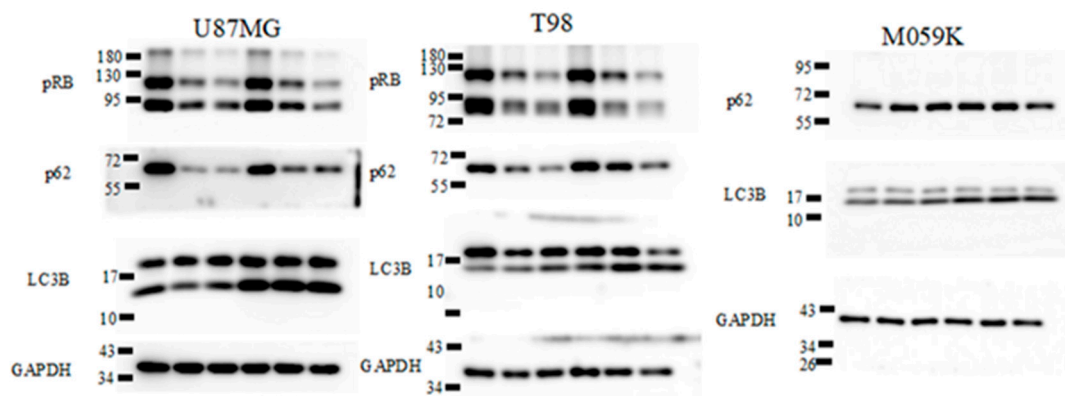

Figure S2. Abemaciclib treatment induces autophagy activation in GBM cells.

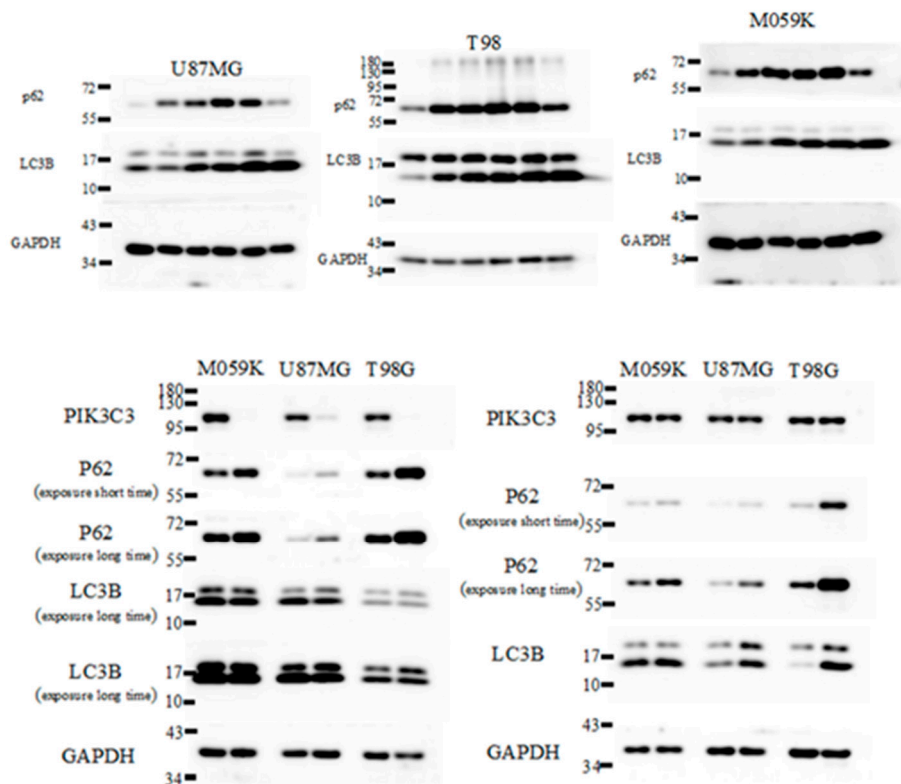

Figure S3. MPT0L145 targets PIK3C3 and increases incomplete autophagy on U87MG, T98G and M059K cells.

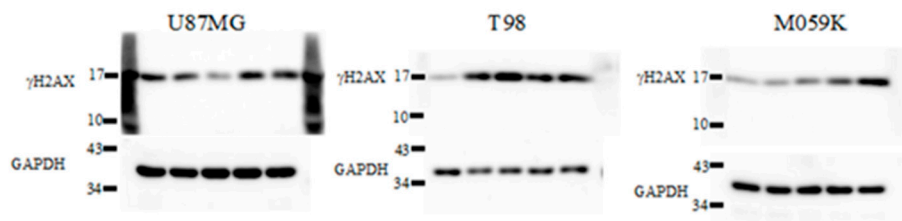

Figure S4. MPT0L145 treatment induces up-regulation of DNA damage marker,  $\gamma$ H2AX, in GBM cells.

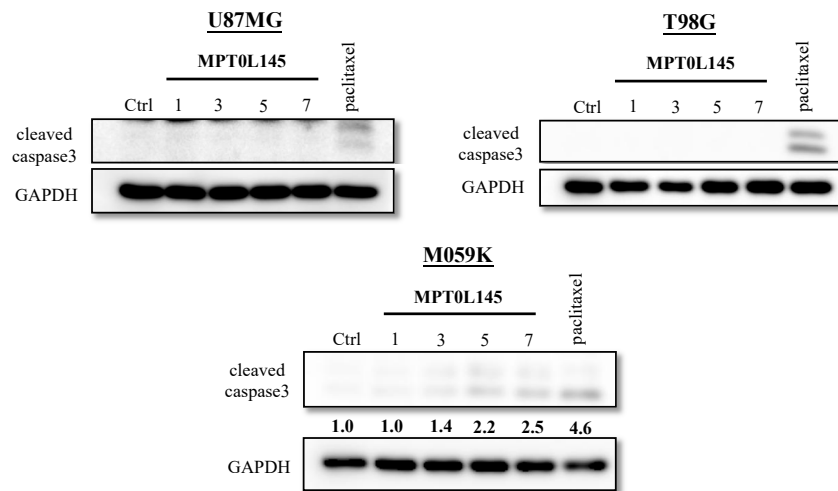

Figure S5. Effects of MPT0L145 on apoptosis. The three cancer cells were treated with indicated concentrations of MPT0L145 for 72 h. Protein lysates were subjected to Western blot analysis for detection cleavage fragments of caspase 3.

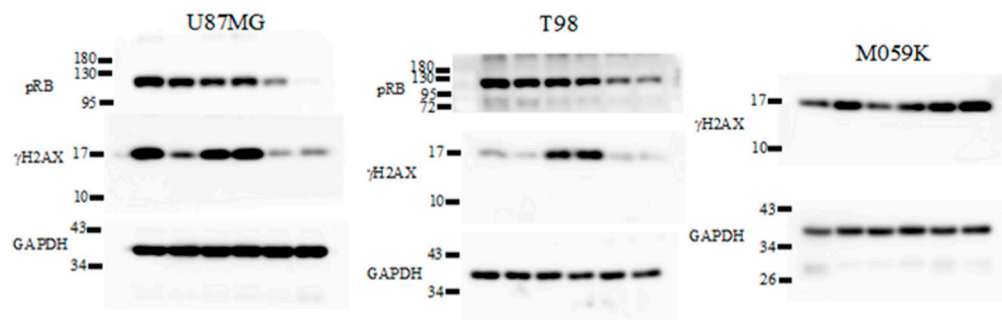

Figure S6. Status of RB and  $\gamma$ H2AX after combinations treatment on the U87MG, T98G and M059K cells.

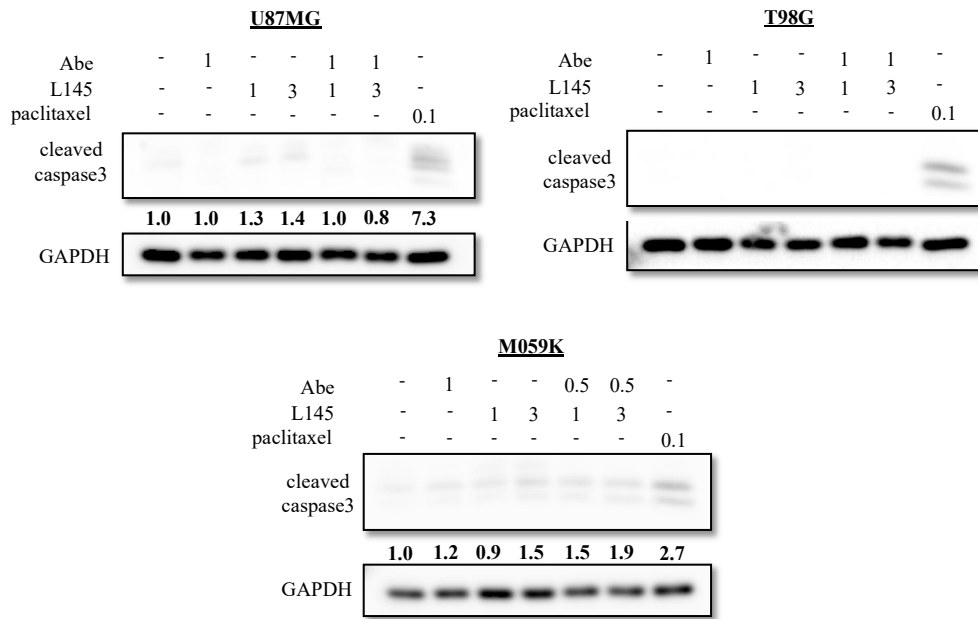

Figure S7. Effects of drug combination on apoptosis. The three cancer cells were treated with abemaciclib in the absence or presence of indicated concentrations of MPT0L145 for 72 h. Protein lysates were subjected to Western blot analysis for detection cleavage fragments of caspase 3.

Table S1. Significantly pathways analyzed by IPA

**Up-regulated Pathways**

| Ingenuity Canonical Pathways                                              | -log(p-value) | Ratio | z-score |
|---------------------------------------------------------------------------|---------------|-------|---------|
| PTEN Signaling                                                            | 1.58          | 0.127 | 2.84    |
| Superpathway of Cholesterol Biosynthesis                                  | 5.76          | 0.407 | 2.714   |
| Mevalonate Pathway I                                                      | 2.92          | 0.417 | 2.236   |
| Superpathway of Geranylgeranyldiphosphate Biosynthesis I (via Mevalonate) | 2.29          | 0.312 | 2.236   |
| Phospholipases                                                            | 1.6           | 0.158 | 2.121   |
| PPAR $\alpha$ /RXR $\alpha$ Activation                                    | 2.43          | 0.135 | 2.065   |
| Oleate Biosynthesis II (Animals)                                          | 2.34          | 0.4   | 2       |
| Methylglyoxal Degradation III                                             | 1.89          | 0.308 | 2       |
| Endothelin-1 Signaling                                                    | 3.33          | 0.149 | 1.8     |
| PEDF Signaling                                                            | 1.72          | 0.146 | 1.732   |
| Cell Cycle: G2/M DNA Damage Checkpoint Regulation                         | 2.01          | 0.184 | 1.667   |
| Cholesterol Biosynthesis I                                                | 3.72          | 0.462 | 1.633   |
| Cholesterol Biosynthesis II (via 24,25-dihydrolanosterol)                 | 3.72          | 0.462 | 1.633   |
| Cholesterol Biosynthesis III (via Desmosterol)                            | 3.72          | 0.462 | 1.633   |
| Superpathway of Inositol Phosphate Compounds                              | 2.64          | 0.136 | 1.569   |
| JAK/Stat Signaling                                                        | 1.44          | 0.138 | 1.508   |
| Gaq Signaling                                                             | 4.21          | 0.171 | 1.46    |
| 3-phosphoinositide Biosynthesis                                           | 2.41          | 0.138 | 1.279   |
| UVA-Induced MAPK Signaling                                                | 2.65          | 0.165 | 1.265   |
| SPINK1 General Cancer Pathway                                             | 1.83          | 0.164 | 1.265   |
| Apelin Pancreas Signaling Pathway                                         | 1.4           | 0.163 | 1.134   |
| D-myo-inositol-5-phosphate Metabolism                                     | 2.39          | 0.14  | 1.091   |
| Adrenomedullin signaling pathway                                          | 1.76          | 0.12  | 1.091   |
| Th1 Pathway                                                               | 2.2           | 0.145 | 1.069   |
| PPAR Signaling                                                            | 1.73          | 0.139 | 1.069   |
| Pentose Phosphate Pathway                                                 | 2.34          | 0.4   | 1       |
| NAD biosynthesis II (from tryptophan)                                     | 2.02          | 0.333 | 1       |
| Superpathway of Citrulline Metabolism                                     | 1.66          | 0.267 | 1       |
| Oxidative Ethanol Degradation III                                         | 1.66          | 0.267 | 1       |
| Ethanol Degradation IV                                                    | 1.31          | 0.211 | 1       |

**Down-regulated Pathways**

| Ingenuity Canonical Pathways                                            | -log(p-value) | Ratio | z-score |
|-------------------------------------------------------------------------|---------------|-------|---------|
| ERK/MAPK Signaling                                                      | 2.31          | 0.13  | -1      |
| Adenosine Nucleotides Degradation II                                    | 1.66          | 0.267 | -1      |
| Fatty Acid $\alpha$ -oxidation                                          | 1.56          | 0.25  | -1      |
| Purine Nucleotides Degradation II (Aerobic)                             | 1.38          | 0.222 | -1      |
| $\alpha$ -Adrenergic Signaling                                          | 1.35          | 0.129 | -1      |
| ErbB Signaling                                                          | 2.03          | 0.151 | -1.069  |
| Actin Cytoskeleton Signaling                                            | 1.3           | 0.108 | -1.147  |
| Glioma Signaling                                                        | 2.92          | 0.165 | -1.155  |
| Fc $\gamma$ Receptor-mediated Phagocytosis in Macrophages and Monocytes | 2.03          | 0.151 | -1.387  |
| Actin Nucleation by ARP-WASP Complex                                    | 1.45          | 0.143 | -1.414  |
| T Cell Exhaustion Signaling Pathway                                     | 1.3           | 0.112 | -1.5    |
| PD-1, PD-L1 cancer immunotherapy pathway                                | 1.35          | 0.126 | -1.508  |
| Estrogen-mediated S-phase Entry                                         | 1.96          | 0.231 | -1.633  |
| Inhibition of Matrix Metalloproteases                                   | 4.13          | 0.289 | -1.667  |
| Neuregulin Signaling                                                    | 1.99          | 0.149 | -1.732  |
| VEGF Signaling                                                          | 2.25          | 0.155 | -1.807  |
| Oncostatin M Signaling                                                  | 1.87          | 0.186 | -1.89   |
| Cyclins and Cell Cycle Regulation                                       | 2.2           | 0.162 | -2.309  |
| STAT3 Pathway                                                           | 1.91          | 0.133 | -2.496  |

Table S2. The combination index (CI) values of different drug combinations in GBM cancer cells

| U87MG (72h, MTT assay)    |                              |       | T98G (72h, MTT assay)     |                              |       |
|---------------------------|------------------------------|-------|---------------------------|------------------------------|-------|
| MPT0L145<br>( $\infty$ M) | Abemaciclib<br>( $\infty$ M) | CI    | MPT0L145<br>( $\infty$ M) | Abemaciclib<br>( $\infty$ M) | CI    |
| 1.0                       | 0.5                          | 1.667 | 1.0                       | 0.5                          | 0.518 |
| 1.0                       | 0.5                          | 1.769 | 1.0                       | 0.5                          | 0.628 |
| 3.0                       | 0.5                          | 0.788 | 3.0                       | 0.5                          | 0.351 |
| 3.0                       | 0.5                          | 0.783 | 3.0                       | 0.5                          | 0.326 |
| 1.0                       | 1.0                          | 0.599 | 1.0                       | 1.0                          | 0.438 |
| 1.0                       | 1.0                          | 0.591 | 1.0                       | 1.0                          | 0.461 |
| 3.0                       | 1.0                          | 0.698 | 3.0                       | 1.0                          | 0.291 |
| 3.0                       | 1.0                          | 0.700 | 3.0                       | 1.0                          | 0.249 |

  

| M059K (72h, MTT assay)    |                              |       |
|---------------------------|------------------------------|-------|
| MPT0L145<br>( $\infty$ M) | Abemaciclib<br>( $\infty$ M) | CI    |
| 1.0                       | 0.25                         | 1.081 |
| 1.0                       | 0.25                         | 1.116 |
| 3.0                       | 0.25                         | 0.877 |
| 3.0                       | 0.25                         | 0.92  |
| 1.0                       | 0.5                          | 1.07  |
| 1.0                       | 0.5                          | 1.105 |
| 3.0                       | 0.5                          | 0.947 |
| 3.0                       | 0.5                          | 0.937 |
